# Supplementary material for: Tree-ring based spring precipitation reconstruction in the Sikhote-Alin Mountain Range
Source: Copernicus journal article supplement (doi:10.5194/cp-2020-49), 2020-04-21
Supplement: Supplementary file [file cp-2020-49-AC2-supplement.pdf]

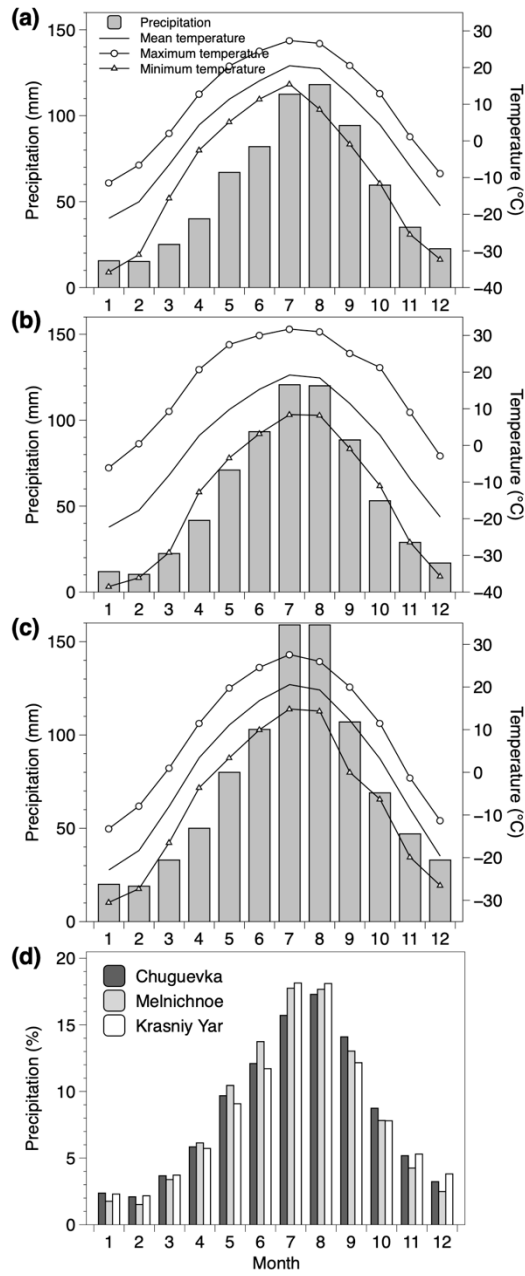

**Figure S1: Monthly total precipitation and mean, minimum and maximum temperature at (a) Chuguevka (1936-2004), (b) Melnichnoe (1941-2009), and (c) Krasniy Yar (1940-2013) meteorological stations; (d) annual precipitation distribution in percent for all three meteorological stations.**

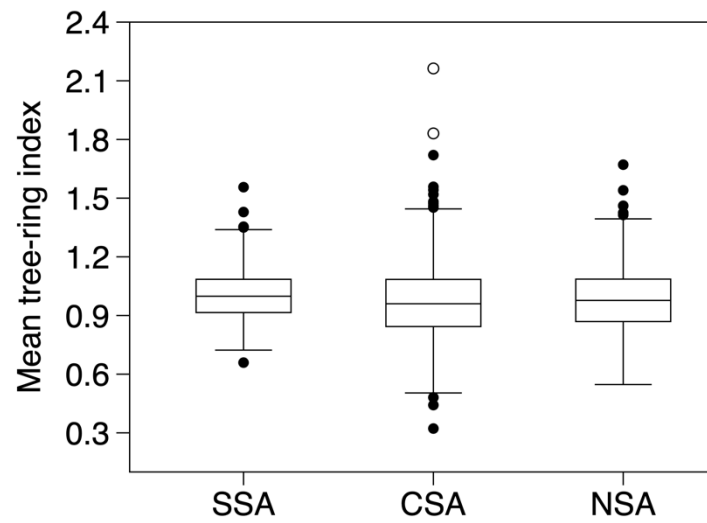

**Figure S2: Mean tree-ring index for SSA, CSA and NSA chronologies. Boxes represent the interquartile range, and the horizontal line within the box shows the median. Whiskers extend to the 10<sup>th</sup> and 90<sup>th</sup> percentiles; the points show outliers and the circles show extremes beyond the 90<sup>th</sup> percentile.**

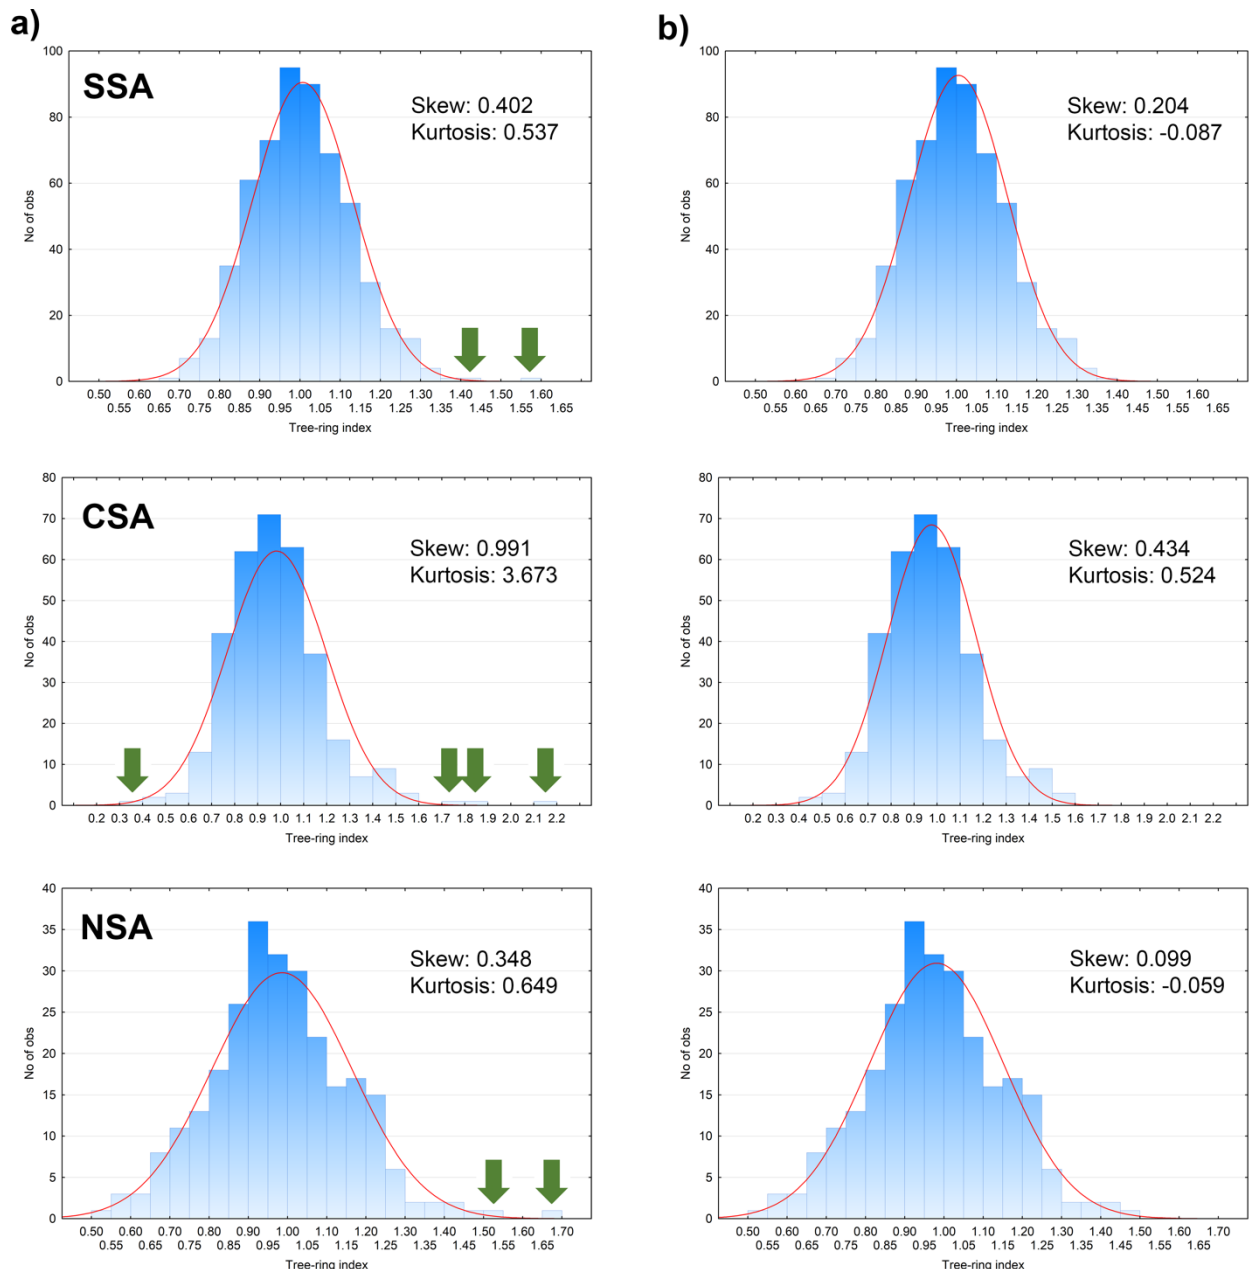

**Figure S3: Distribution of the tree-ring indexes for SSA, CSA and NSA chronologies: before (a) and after (b) filtering outliers (using Z-score, with -3 and 3 as threshold values) in the beginning of the chronologies (where EPS < 0.85). Green arrows indicate outliers (the values are caused by the low sample depth); red lines are the fit with a normal curve.**

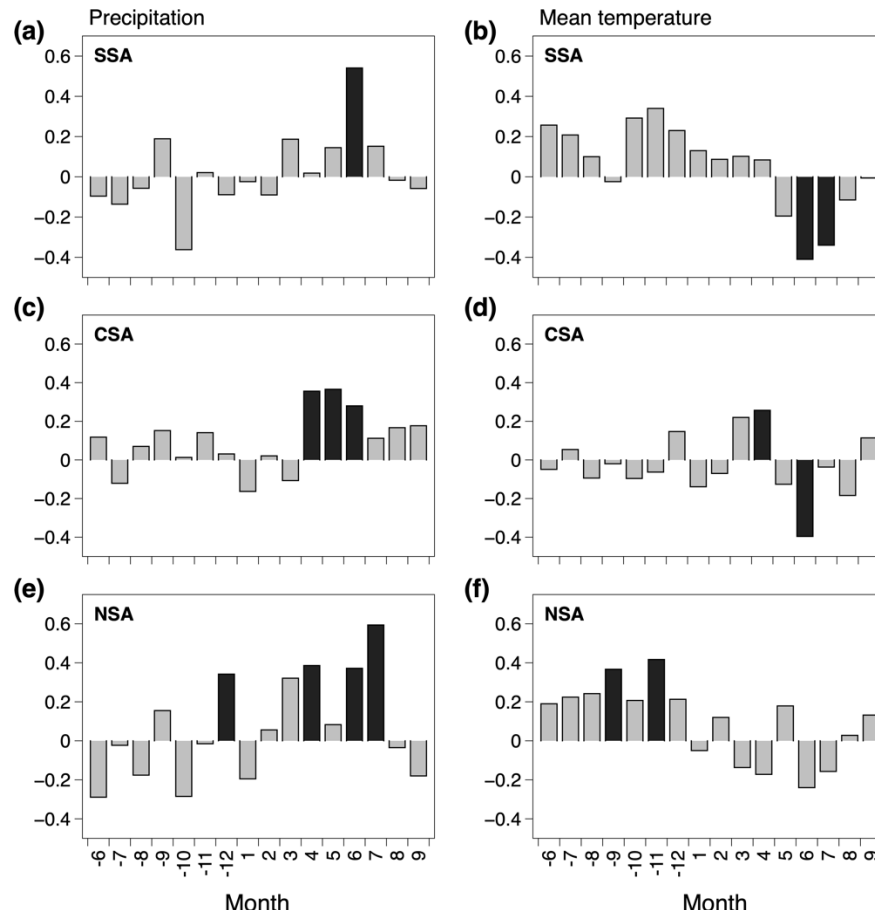

**Figure S4:** The correlation between the meteorological data (total precipitation and mean temperature) from Chuguevka meteorological station and SSA tree-ring width index (a, b), Melnichnoe meteorological station and CSA tree-ring width index (c, d), Krasniy Yar meteorological station and NSA tree-ring width index (e, f). Black bars denote significant values ( $\alpha = 0.01$ ).

**Table S1.** Correlation between instrumental precipitation data and monthly climate indexes. April-June and July-September are the durations of the first and second stages of the summer monsoon, respectively; April-September is entire summer monsoon period. Significant correlations ( $p < 0.05$ ) are marked in bold.

| Index   | Chuguevka |         |               | Melnichoye |         |               | Krasny Yar |         |              |
|---------|-----------|---------|---------------|------------|---------|---------------|------------|---------|--------------|
|         | Apr-Jun   | Jul-Sep | Apr-Sep       | Apr-Jun    | Jul-Sep | Apr-Sep       | Apr-Jun    | Jul-Sep | Apr-Sep      |
| SOI     | 0.151     | 0.199   | <b>0.351</b>  | 0.037      | 0.107   | 0.140         | -0.035     | -0.072  | -0.02        |
| NINO3   | 0.021     | -0.195  | -0.194        | 0.080      | 0.033   | 0.030         | 0.130      | -0.034  | -0.012       |
| NINO4   | -0.055    | -0.137  | -0.185        | -0.004     | -0.013  | -0.113        | 0.121      | 0.026   | 0.062        |
| NINO3.4 | -0.046    | -0.184  | <b>-0.399</b> | 0.076      | 0.037   | -0.034        | 0.130      | 0.030   | 0.043        |
| PDO     | -0.075    | -0.158  | <b>-0.331</b> | -0.037     | -0.211  | <b>-0.419</b> | -0.011     | -0.188  | -0.123       |
| AO      | 0.188     | -0.108  | 0.099         | -0.009     | 0.002   | 0.062         | 0.175      | 0.114   | <b>0.267</b> |
